# Supplementary material
Source: MDPI journal article supplement (https://www.mdpi.com/2504-5377/2/2/24)
Supplement: s1 [file s1]

## Supporting Information

# ***Hydrolase-Like Activity Provided by Zinc(II) and Oleoyl-Histidine at Liposome Membrane Surface***

Atsushi Tauchi, Keishi Suga and Hiroshi Umakoshi

Division of Chemical Engineering, Graduate School of Engineering Science, Osaka University,  
1-3 Machikaneyama-cho, Toyonaka, Osaka 560-8531, Japan

**Keywords:** Artificial Enzyme, Liposome, Membrane Interface, Histidine, Zinc(II)

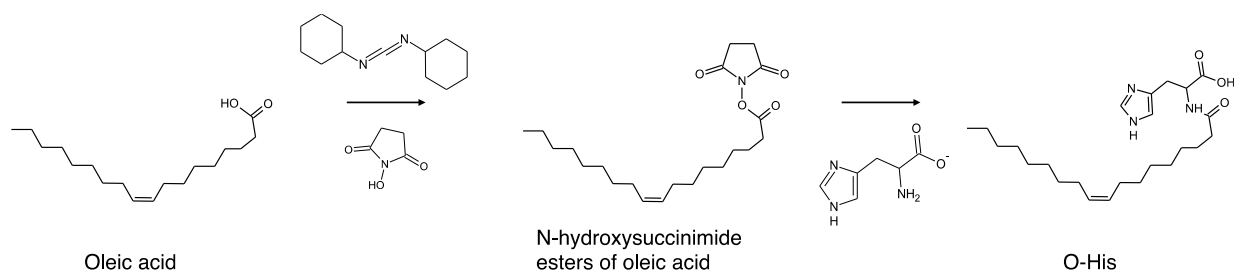

**Figure S1.** Synthesis scheme for O-His. Yield was 55.9%.

(a)

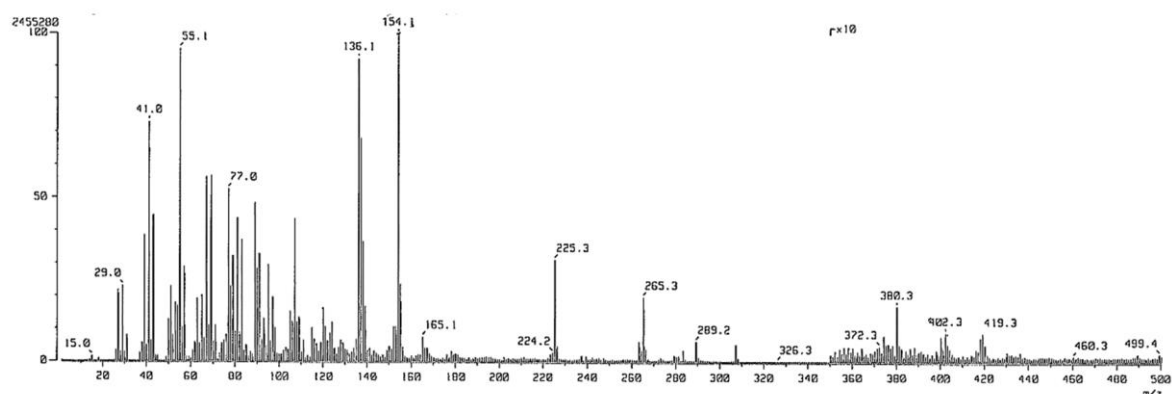

(b)

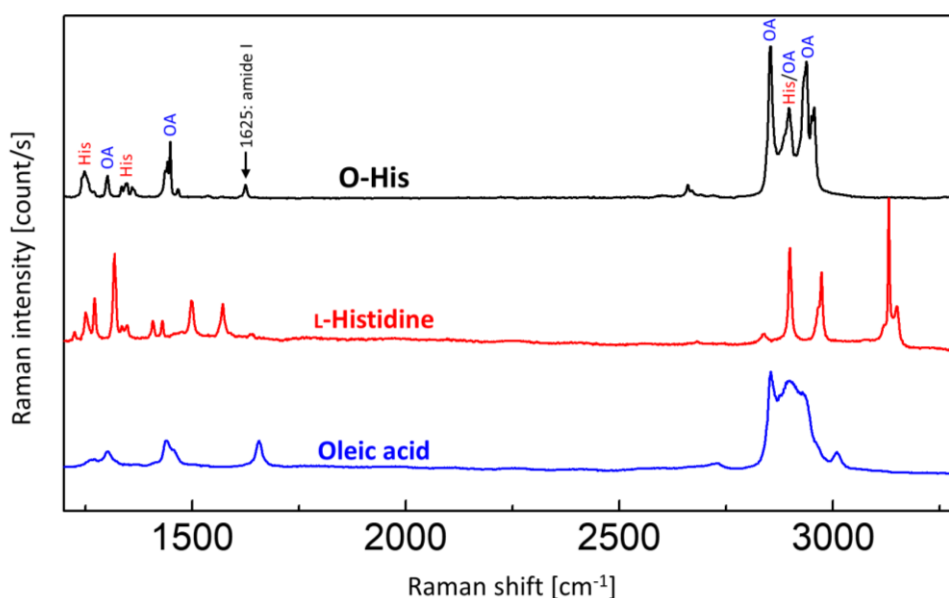

**Figure S2.** (a) MS spectrum of synthesized O-His ( $M_w$ : 419.6). (b) Raman spectra of O-His (solid powder: *black line*), L-Histidine (His) (solid powder: *red line*), and Oleic acid (OA) (liquid: *blue line*). In O-His spectrum, the peak at 1625  $\text{cm}^{-1}$  (amide I) was generated, while the peak at 3100-3150  $\text{cm}^{-1}$  (terminal amino group) was disappeared. The assignments of His and OA were as follows: 1248 ( $\delta\text{C-N}$  (His)), 1301 ( $\text{CH}_2$ , twist (OA)), 1347 ( $\nu$  ring (C-N) (His)), 1440 ( $\text{CH}_2$ , bent (OA)), 2855 ( $\nu$   $\text{CH}_2$  (OA)), 2855 ( $\nu$   $\text{CH}_2$  (OA)), 2928 ( $\nu$   $\text{CH}_3$  (OA)).

Peak assignments were taken from literature:

Mesu, J.G.; Visser, T.; Soulimani, F.; Weckhuysen, B.M. Infrared and Raman spectroscopic study of pH-induced structural changes of L-histidine in aqueous environment. *Vibrational Spectrosc.* **2005**, 39 (1), 114-125.

Czamara, K.; Majzner, K.; Pacia, M. Z.; Kochan, K.; Kaczor, A.; Baranska, M. Raman spectroscopy of lipids: A review. *J. Raman Spectrosc.* **2015**, 46 (1), 4-20.

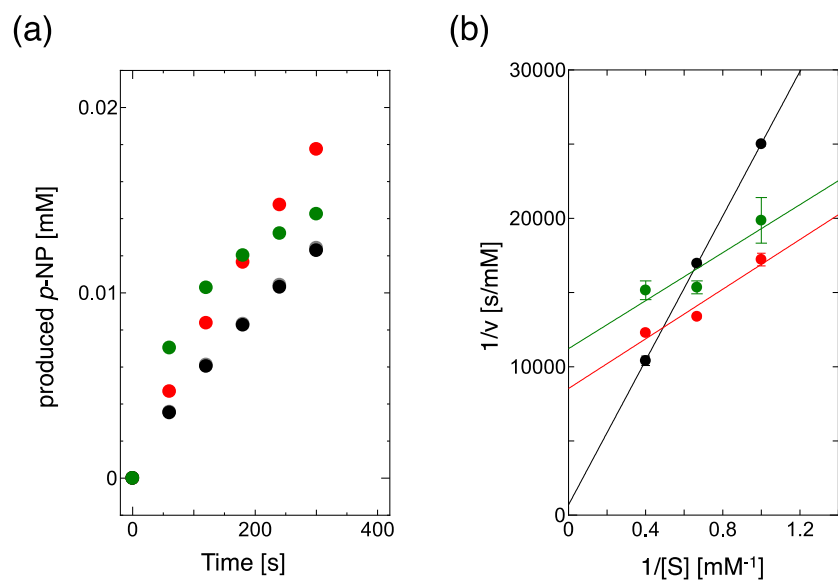

**Figure S3.** (a) Time course of *p*-NP production in the presence of DPPC (O-His 20mol%) (green). (b) Lineweaver-Burk plot for DPPC (O-His 20mol%). [O-His] = 0.3 mM, [O-His]/[Zn<sup>2+</sup>] = 3/1. Experiments were conducted at 25 °C.

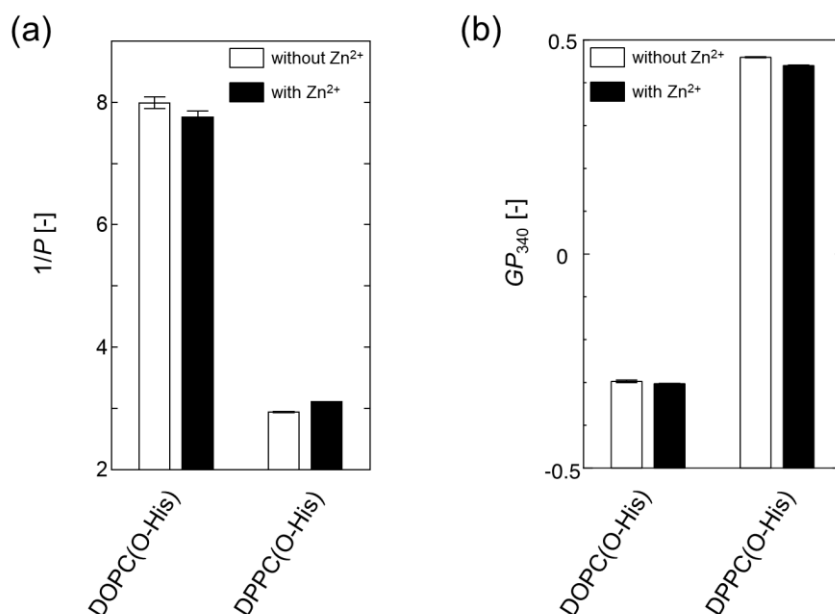

**Figure S4.** (a) Inner membrane fluidities ( $1/P$ ) of liposomes. A lower  $1/P$  indicates a decrease of fluidity. (b) Inner membrane polarities ( $GP_{340}$ ) of liposomes. A lower  $GP_{340}$  indicates an increase of polarity. [Total amphiphile] = 100  $\mu$ M, [DPH] = 0.4  $\mu$ M, [Laurdan] = 1  $\mu$ M, [O-His] = 20  $\mu$ M, [O-His]/[ $Zn^{2+}$ ] = 3/1. Experiments were conducted at 25  $^{\circ}$ C. When the domain (e.g., lipid raft composed of cholesterol and sphingomyelin) is formed, drastic changes in inner membrane properties ( $1/P$  and  $GP_{340}$  values) can be observed. Herein, inner membrane properties were not significantly changed by the presence of  $Zn^{2+}$ , suggesting that the addition of  $Zn^{2+}$  could hardly induce the domain formation (no raft-like ordered domain of O-His/ $Zn^{2+}$  can be formed).
